# Supplementary material for: Plectronoceratids (Cephalopoda) from the latest Cambrian at Black Mountain, Queensland, reveal complex three-dimensional siphuncle morphology, with major taxonomic implications
Source: PeerJ journal article supplement (doi:10.7717/peerj.17003), 2024-02-29
Supplement: Supplemental_Table_S1.pdf [file Supplemental_Table_S1.pdf]

**Table S1.** P-values of pairwise comparisons (ANOVA) of regression coefficients of relative cameral length (=RCL) between species. In the linear regression models, species are included as interaction terms. Significant p-values (< 0.05) are highlighted in bold. Non-significant p-values cannot reject that the slopes of the ontogenetic trajectories are statistically distinct (i.e., parallel).

| RCL                   | <i>Pa. mutabile</i> | <i>Pl. cambria</i> | <i>S. bullatum</i> | <i>S. endogastrum</i> | <i>S. inflatum</i> | <i>S. magicum</i> | <i>S. marywadeae</i> | <i>S. shanxiense</i> | <i>S. sibirienne</i> | <i>S. sinense</i> | <i>S. wanwanense</i> |
|-----------------------|---------------------|--------------------|--------------------|-----------------------|--------------------|-------------------|----------------------|----------------------|----------------------|-------------------|----------------------|
| <i>Pa. mutabile</i>   |                     | 0.5649             | <b>&lt; 0.0001</b> | 0.3869                | <b>0.0148</b>      | 0.1217            | <b>&lt; 0.0001</b>   | 0.0132               | 0.0857               | <b>0.0001</b>     | <b>&lt; 0.0001</b>   |
| <i>Pl. cambria</i>    | 0.5649              |                    | <b>0.0344</b>      | 0.6689                | 0.6241             | 0.1391            | <b>0.0166</b>        | 0.4440               | 0.0600               | <b>0.0484</b>     | 0.0604               |
| <i>S. bullatum</i>    | <b>&lt; 0.0001</b>  | <b>0.0344</b>      |                    | 0.1314                | <b>0.0039</b>      | 0.6789            | 0.1365               | <b>0.0005</b>        | 0.8266               | 0.2464            | 0.0771               |
| <i>S. endogastrum</i> | 0.3869              | 0.6689             | 0.1314             |                       | 0.8011             | 0.2769            | 0.1235               | 0.7557               | 0.1324               | 0.1583            | 0.2172               |
| <i>S. inflatum</i>    | <b>0.0148</b>       | 0.6241             | <b>0.0039</b>      | 0.8011                |                    | 0.8549            | <b>&lt; 0.0001</b>   | 0.6424               | 0.7268               | 0.2514            | <b>0.0016</b>        |
| <i>S. magicum</i>     | 0.1217              | 0.1391             | 0.6789             | 0.2769                | 0.8549             |                   | 0.7539               | 0.4689               | 0.4728               | 0.8423            | 0.8314               |
| <i>S. marywadeae</i>  | <b>&lt; 0.0001</b>  | <b>0.0166</b>      | 0.1365             | 0.1235                | <b>&lt; 0.0001</b> | 0.7539            |                      | <b>&lt; 0.0001</b>   | 0.7676               | 0.4559            | 0.2617               |
| <i>S. shanxiense</i>  | 0.0132              | 0.4440             | <b>0.0005</b>      | 0.7557                | 0.6424             | 0.4689            | <b>&lt; 0.0001</b>   |                      | 0.2538               | <b>0.0137</b>     | <b>0.0006</b>        |
| <i>S. sibirienne</i>  | 0.0857              | 0.0600             | 0.8266             | 0.1324                | 0.7268             | 0.4728            | 0.7676               | 0.2538               |                      | 0.6089            | 0.7664               |
| <i>S. sinense</i>     | <b>0.0001</b>       | <b>0.0484</b>      | 0.2464             | 0.1583                | 0.2514             | 0.8423            | 0.4559               | <b>0.0137</b>        | 0.6089               |                   | 0.7153               |
| <i>S. wanwanense</i>  | <b>&lt; 0.0001</b>  | 0.0604             | 0.0771             | 0.2172                | <b>0.0016</b>      | 0.8314            | 0.2617               | <b>0.0006</b>        | 0.7664               | 0.7153            |                      |
