# Supplementary material for: Plectronoceratids (Cephalopoda) from the latest Cambrian at Black Mountain, Queensland, reveal complex three-dimensional siphuncle morphology, with major taxonomic implications
Source: PeerJ journal article supplement (doi:10.7717/peerj.17003), 2024-02-29
Supplement: Supplemental_Table_S2.pdf [file Supplemental_Table_S2.pdf]

**Table S2.** P-values of pairwise comparisons (ANOVA) of regression coefficients of height expansion rate (= ER<sub>h</sub>) between species. In the linear regression models, species are included as interaction terms. Significant p-values (< 0.05) are highlighted in bold. Non-significant p-values cannot reject that the slopes of the ontogenetic trajectories are statistically distinct (i.e., parallel).

| ER <sub>h</sub>       | <i>Pa. mutabile</i> | <i>Pl. cambria</i> | <i>S. bullatum</i> | <i>S. endogastrum</i> | <i>S. inflatum</i> | <i>S. magicum</i> | <i>S. marywadeae</i> | <i>S. shanxiense</i> | <i>S. sibiricense</i> | <i>S. sinense</i> | <i>S. wanwanense</i> |
|-----------------------|---------------------|--------------------|--------------------|-----------------------|--------------------|-------------------|----------------------|----------------------|-----------------------|-------------------|----------------------|
| <i>Pa. mutabile</i>   |                     | 0.1119             | 0.7736             | 0.7750                | 0.4950             | 0.8954            | 0.5441               | <b>0.0060</b>        | 0.4165                | 0.0596            | 0.7557               |
| <i>Pl. cambria</i>    | 0.1119              |                    | 0.6165             | 0.3660                | 0.4521             | 0.1645            | 0.5441               | 0.9255               | <b>0.0120</b>         | 0.0433            | 0.7302               |
| <i>S. bullatum</i>    | 0.7736              | 0.6165             |                    | 0.9681                | <b>0.0332</b>      | 0.9848            | 0.2838               | 0.0357               | 0.7480                | 0.2111            | 0.6623               |
| <i>S. endogastrum</i> | 0.7750              | 0.3660             | 0.9681             |                       | 0.8174             | 0.8356            | 0.9918               | 0.5298               | 0.2140                | 0.3304            | 0.9972               |
| <i>S. inflatum</i>    | 0.4950              | 0.4521             | <b>0.0332</b>      | 0.8174                |                    | 0.8456            | < <b>0.0001</b>      | <b>0.0043</b>        | 0.9519                | 0.8340            | <b>0.0163</b>        |
| <i>S. magicum</i>     | 0.8954              | 0.1645             | 0.9848             | 0.8356                | 0.8456             |                   | 0.9266               | 0.4444               | 0.0532                | 0.3220            | 0.9674               |
| <i>S. marywadeae</i>  | 0.5441              | 0.5441             | 0.2838             | 0.9918                | < <b>0.0001</b>    | 0.9266            |                      | <b>0.0074</b>        | 0.6627                | 0.0500            | 0.7296               |
| <i>S. shanxiense</i>  | <b>0.0060</b>       | 0.9255             | 0.0357             | 0.5298                | <b>0.0043</b>      | 0.4444            | <b>0.0074</b>        |                      | 0.1652                | <b>0.0025</b>     | 0.1199               |
| <i>S. sibiricense</i> | 0.4165              | <b>0.0120</b>      | 0.7480             | 0.2140                | 0.9519             | 0.0532            | 0.6627               | 0.1652               |                       | 0.9542            | 0.8095               |
| <i>S. sinense</i>     | 0.0596              | 0.0433             | 0.2111             | 0.3304                | 0.8340             | 0.3220            | 0.0500               | <b>0.0025</b>        | 0.9542                |                   | 0.2943               |
| <i>S. wanwanense</i>  | 0.7557              | 0.7302             | 0.6623             | 0.9972                | <b>0.0163</b>      | 0.9674            | 0.7296               | 0.1199               | 0.8095                | 0.2943            |                      |
