# Supplementary material for: Plectronoceratids (Cephalopoda) from the latest Cambrian at Black Mountain, Queensland, reveal complex three-dimensional siphuncle morphology, with major taxonomic implications
Source: PeerJ journal article supplement (doi:10.7717/peerj.17003), 2024-02-29
Supplement: Supplemental_Table_S4.pdf [file Supplemental_Table_S4.pdf]

**Table S4.** P-values of pairwise comparisons (ANOVA) of intercepts of height expansion rate (=  $ER_h$ ) between species, where no significant difference in slope was detected (Table S2). In the linear regression models, species are included as interaction terms. Significant p-values (< 0.05) are highlighted in bold, representing cases where the trajectories may be parallel, but the intercept is significantly different, i.e.,  $ER_h$  is distinct at the same conch height.

| $ER_h$                | <i>Pa. mutabile</i> | <i>Pl. cambria</i> | <i>S. bullatum</i> | <i>S. endogastrum</i> | <i>S. inflatum</i> | <i>S. magicum</i> | <i>S. marywadeae</i> | <i>S. shanxiense</i> | <i>S. sibirienne</i> | <i>S. sinense</i>  | <i>S. wanwanense</i> |
|-----------------------|---------------------|--------------------|--------------------|-----------------------|--------------------|-------------------|----------------------|----------------------|----------------------|--------------------|----------------------|
| <i>Pa. mutabile</i>   |                     | 0.1136             | 0.4909             | 0.0865                | 0.5581             | 0.0779            | 0.4390               | 0.2536               | <b>0.0445</b>        | 0.1009             | 0.6490               |
| <i>Pl. cambria</i>    | 0.1136              |                    | 0.1757             | <b>0.0042</b>         | 0.1859             | <b>0.0036</b>     | <b>0.0499</b>        | 0.0576               |                      | <b>0.0075</b>      | 0.2855               |
| <i>S. bullatum</i>    | 0.4909              | 0.1757             |                    | <b>0.0012</b>         |                    | <b>0.0019</b>     | <b>&lt; 0.0001</b>   | <b>0.0012</b>        | <b>0.0004</b>        | <b>0.0012</b>      | <b>0.0047</b>        |
| <i>S. endogastrum</i> | 0.0865              | <b>0.0042</b>      | <b>0.0012</b>      |                       |                    | 0.2897            | 0.7692               | 0.6873               | 0.2107               | 0.4442             | 0.8692               |
| <i>S. inflatum</i>    | 0.5581              | 0.1859             |                    |                       |                    | <b>0.0346</b>     | <b>0.0385</b>        |                      |                      | <b>0.0268</b>      | <b>0.0349</b>        |
| <i>S. magicum</i>     | 0.0779              | <b>0.0036</b>      | <b>0.0019</b>      | 0.2897                | <b>0.0346</b>      |                   | 0.8373               | 0.7852               | 0.0984               | 0.5358             | 0.9094               |
| <i>S. marywadeae</i>  | 0.4390              | <b>0.0499</b>      | <b>&lt; 0.0001</b> | 0.7692                | <b>0.0385</b>      | 0.8373            |                      |                      | <b>&lt; 0.0001</b>   | <b>&lt; 0.0001</b> | <b>&lt; 0.0001</b>   |
| <i>S. shanxiense</i>  | 0.2536              | 0.0576             | <b>0.0012</b>      | 0.6873                |                    | 0.7852            |                      |                      | <b>&lt; 0.0001</b>   |                    | <b>0.0003</b>        |
| <i>S. sibirienne</i>  | <b>0.0445</b>       |                    | <b>0.0004</b>      | 0.2107                |                    | 0.0984            | <b>&lt; 0.0001</b>   | <b>&lt; 0.0001</b>   |                      | 0.4047             | 0.8939               |
| <i>S. sinense</i>     | 0.1009              | <b>0.0075</b>      | <b>0.0012</b>      | 0.4442                | <b>0.0268</b>      | 0.5358            | <b>&lt; 0.0001</b>   |                      | 0.4047               |                    | 0.6957               |
| <i>S. wanwanense</i>  | 0.6490              | 0.2855             | <b>0.0047</b>      | 0.8692                | <b>0.0349</b>      | 0.9094            | <b>&lt; 0.0001</b>   | <b>0.0003</b>        | 0.8939               | 0.6957             |                      |
